# Supplementary material for: Treatment of obstructive sleep apnea using CPAP and cognitive impairment
Source: Research Square preprint supplement (doi:10.21203/rs.3.rs-7795811/v1), 2026-02-24
Supplement: Supplementary file 1 [file 2876c3b195404cbff63c9faa.docx]

**Table 1. Baseline Demographics and Clinical Characteristics**

|  | **OSA-CPAP**  **(n = 50)** | **OSA-no treatment**  **(n = 50)** | **Non-OSA**  **(n = 13)** | **P value** |
| --- | --- | --- | --- | --- |
| **Demographics** |  |  |  |  |
| Age, y | 60.0 (48.0 – 66.0) | 56.5 (44.0 – 70.0) | 45.0 (34.0 – 58.0) | 0.086 |
| Ethnicity, %  Chinese  Malay  Indian  Others | 42 (84.0)  2 (4.0)  3 (6.0)  3 (6.0) | 39 (78.0)  5 (10.0)  2 (4.0)  4 (8.0) | 9 (69.0)  1 (8.0)  2 (15.0)  1 (8.0) | 0.690 |
| Male, % | 34 (68.0) | 35 (70.0) | 10 (77.0) | 0.820 |
| Height, cm | 165.9 9.2 | 167.1 9.2 | 171.9 9.8 | 0.120 |
| Weight, kg | 75.3 (66.7 – 90.0) | 72.8 (68.6 – 93.3) | 81.0 (72.0 – 93.5) | 0.890 |
| BMI, kg/m2 | 27.3 (24.8 – 31.6) | 26.8 (23.9 – 31.6) | 27.1(23.3 – 28.5) | 0.670 |
| Neck Circumference, cm | 40.0 5.4 | 40.6 4.1 | 39.7 3.1 | 0.760 |
| Waist Circumference, cm | 97.4 15.5 | 98.9 12.9 | 95.2 9.0 | 0.670 |
| Hip Circumference, cm | 99.8 (92.0 – 109.0) | 102.3 (97.0 – 111.0) | 100.0 (96.8 – 106.0) | 0.600 |
| Waist Hip Ratio | 0.9 (0.9 – 0.9) | 0.9 (0.9 – 0.9) | 0.9 (0.9 – 0.9) | 0.980 |
| Education, %  10 years  10 years | 7 (14.0)  43 (86.0) | 5 (10.0)  45 (90.0) | 1 (8.0)  12 (92.0) | 0.740 |
| **Cardiovascular risk** |  |  |  |  |
| Hypertension, %  < 5 years  5-10 years  10 years  Unknown | 28 (56.0)  5 (17.0)  7 (24.0)  15 (52.0)  2 (7.0) | 28 (56.0)  7 (24.0)  9 (31.0)  12 (41.0)  1 (3.0) | 2 (15.0)  1 (50.0)  0 (0.0)  0 (0.0)  0 (0.0) | 0.022*  0.760 |
| Diabetes mellitus, %  Insulin Dependent  Non-Insulin Dependent | 11 (22.0)  1 (9.0)  10 (91.0) | 13 (26.0)  4 (31.0)  9 (69.0) | 0 (0.0)  0 (0.0)  0 (0.0) | 0.120  0.240 |
| Hyperlipidemia, % | 23 (46.0) | 19 (38.0) | 2 (15.0) | 0.130 |
| Smoker, %  Current smoker  Ex-smoker | 8 (16.0)  2 (25.0)  6 (75.0) | 11 (22.0)  2 (17.0)  10 (83.0) | 4 (31.0)  1 (20.0)  4 (80.0) | 0.460  0.900 |
| Alcohol consumption, %  Light drinker  Moderate drinker  Heavy drinker | 14 (28.0)  13 (93.0)  1 (7.0)  0 (0.0) | 11 (22.0)  10 (83.0)  1 (8.0)  1 (8.3) | 7 (54.0)  6 (86.0)  1 (14.0)  0 (0.0) | 0.076  0.720 |
| Chronic kidney disease, % | 4 (8.0) | 4 (8.0) | 0 (0.0) | 0.440 |
| Previous MI, % | 13 (26.0) | 12 (24.0) | 2 (15.0) | 0.520 |
| Neurology disease, % | 3 (6.0) | 1 (2.0) | 0 (0.0) | 0.270 |
| Hypertension Medication  ACE-i/ ARB, %  CCB, %   Thiazide, %   Loop diuretic, %  Beta blocker, %   Aldosterone blocker, % | 17 (34.0)  14 (28.0)  0 (0.0)  1 (2.0)  7 (14.0)  0 (0.0) | 17 (34.0)  14 (28.0)  3 (6.0)  0 (0.0)  9 (18.0)  1 (2.0) | 1 (7.7)  1 (7.7)  0 (0.0)  0 (0.0)  0 (0.0)  0 (0.0) | 0.900  0.920  0.230  0.550  0.630  0.610 |

**Abbreviation.** OSA: Obstructive Sleep Apnea; BMI: Body Mass Index; MI: Myocardial Infarction, ACE-i: Angiotensin Converting Enzyme Inhibitor; ARB: Angiotensin Receptor Blocker; CCB: Calcium Channel Blocker.

**Table 2. Baseline ESS and Polysomnography Findings**

|  | **OSA-CPAP**  **(n = 50)** | **OSA-no treatment**  **(n = 50)** | **Non-OSA**  **(n = 13)** | **P value** |
| --- | --- | --- | --- | --- |
| **Sleep Study,** %  PSG  HSAT | 37 (86.0)  6 (14.0) | 36 (77.0)  11 (23.0) | 11 (85.0)  2 (15.0) | 0.490 |
| **Daytime Sleepiness Severity,** % |  |  |  |  |
| Non-sleepy, ESS 0-10 | 43 (86.0) | 33 (66.0) | 11 (85.0) | 0.023* |
| Mild sleepy, ESS 11-14 | 6 (12.0) | 12 (24.0) | 0 (0.0) |
| Moderate sleepy, ESS 15-17 | 1 (2.0) | 3 (6.0) | 0 (0.0) |
| Severe sleepy, ESS 18-24 | 0 (0.0) | 2 (4.0) | 2 (15.0) |
| **AHI, events per hour** | 34.9 (21.6 – 47.2) | 46.8 (37.0 – 63.0) | 8.7 (5.7 – 11.1) | <0.001* |
| **ODI 3%, events per hour** | 16.7 (9.0 – 33.8) | 28.4 (12.0 – 47.9) | 4.1 (1.6 – 6.6) | <0.001* |
| **ODI 4%, events per hour** | 14.6 (3.6 – 24.9) | 14.0 (4.5 – 42.6) | 2.0 (0.5 – 4.7) | 0.020* |
| Baseline SpO2, % | 95.5 (94.5 – 97.0) | 96.0 (94.0 – 98.0) | 96.0 (96.0 – 98.0) | 0.230 |
| Lowest SpO2, %  Total time SpO2< 90, % | 82.0 (74.0 – 89.0)  1.2 (0.0 – 7.1) | 78.0 (72.0 – 87.0)  2.5 (0.2 – 13.9) | 88.0 (85.0 – 92.0)  0.1 (0.0 – 0.6) | 0.012*  0.025* |

**Abbreviation.** OSA: Obstructive Sleep Apnea; PSG: Polysomnography; HSAT: Home Sleep Apnea Testing; AHI: Apnea-Hypopnea Index; ODI: Oxygen Desaturation Indices; ESS: Epworth Sleepiness Scale

**Table 3. MoCA score and Mild Cognitive Impairment**

|  | **OSA-CPAP**  **(n = 50)** | **OSA-no treatment**  **(n = 50)** | **Non-OSA**  **(n = 13)** | **P value** |
| --- | --- | --- | --- | --- |
| Mild Cognitive Impairment, % (n) | 46.0 (n=23) | 70.0 (n=35) | 46.2 (n=6) | 0.038* |
| Total MoCA score (/30)  Memory (/5)  Executive function (/5)  Attention (/4)  Language (/5)  Visuospatial (/5)  Orientation (/6) | 27.5 (26.0 – 29.0)  4 (3 – 5)  5 (4 – 5)  4 (4 – 4)  5 (4 – 5)  5 (4 – 5)  6 (6 – 6) | 26.0 (24.0 – 28.0)  3 (3 – 4)  4 (4 – 5)  4 (4 – 4)  4 (4 – 5)  4 (4 – 5)  6 (6 – 6) | 27.0 (25.0 – 28.0)  4 (4 – 5)  4 (4 – 5)  4 (4 – 4)  5 (4 – 5)  5 (4 – 5)  6 (6 – 6) | 0.005*  0.039*  0.154  0.088  0.232  0.005*  0.599 |

Abbreviation. OSA: Obstructive Sleep Apnea MoCA: Montreal Cognitive Assessment.

**Table 4. The 24-hour ABPM difference between three groups**

|  | **OSA-CPAP**  **(n = 8)** | **OSA-no treatment**  **(n = 7)** | **Non-OSA**  **(n = 2)** | **P value** |
| --- | --- | --- | --- | --- |
| **24-hour ABPM, mmHg**  24-hour Mean BP  24-hour Systolic BP  24-hour Diastolic BP | 90.6 12.0  121.4 15.4  75.6 11.0 | 92.9 9.8  119.6 10.6  79.7 9.8 | 92.5 7.8  120.5 6.4  79.0 8.5 | 0.919  0.965  0.739 |
| **Daytime ABPM, mmHg**  Daytime Systolic BP  Daytime Diastolic BP | 123.4 15.6  77.1 11.3 | 120.6 13.4  81.1 12.6 | 123.5 6.4  82.5 6.4 | 0.922  0.743 |
| **Nighttime ABPM, mmHg**  Nighttime Systolic BP  Nighttime Diastolic BP | 120.0 (114.5 – 127.5)  72.4 11.4 | 116.0 (111.0 – 124.0)  76.9 5.3 | 115.0 (111.0 – 119.0)  71.5 12.0 | 0.612  0.608 |
| **Dipping Systolic, mmHg** | 5.0 6.7 | 1.4 10.7 | 6.8 0.2 | 0.619 |
| **Pulse Pressure, mmHg**  Total Pulse Pressure  Daytime Pulse Pressure  Nighttime Pulse Pressure | 45.3 (41.1 – 47.4)  45.0 (42.6 – 48.6)  43.9 (37.5 – 48.2) | 40.1 (36.1 – 43.1)  40.8 (35.9 – 41.4)  38.8 (33.1 – 46.0) | 41.8 (40.0 – 43.5)  40.9 (40.6 – 41.1)  43.6 (38.9 – 48.3) | 0.289  0.136  0.598 |

Abbreviation. OSA: Obstructive Sleep Apnea; BP: Blood Pressure; mmHg: millimeter mercury.
